# Supplementary material for: methylKit: a comprehensive R package for the analysis of genome-wide DNA methylation profiles
Source: PubMed Central journal article supplement (PMC3491415; doi:10.1186/gb-2012-13-10-r87), 2012-10-03
Supplement: gb-2012-13-10-r87-S2.pdf [file gb-2012-13-10-r87-S2.pdf]

# methyKit: User Guide

Altuna Akalin                      Matthias Kormaksson  
ala2027@med.cornell.edu        mk375@cornell.edu

Sheng Li  
shl2018@med.cornell.edu

April 28, 2012

## Contents

|          |                                                                        |           |
|----------|------------------------------------------------------------------------|-----------|
| <b>1</b> | <b>Introduction</b>                                                    | <b>2</b>  |
| 1.1      | DNA methylation . . . . .                                              | 2         |
| 1.2      | High-throughput bisulfite sequencing . . . . .                         | 2         |
| <b>2</b> | <b>Basics</b>                                                          | <b>3</b>  |
| 2.1      | Reading the methylation call files . . . . .                           | 3         |
| 2.2      | Reading the methylation calls from sorted Bismark alignments . . . . . | 4         |
| 2.3      | Descriptive statistics on samples . . . . .                            | 4         |
| 2.4      | Filtering samples based on read coverage . . . . .                     | 6         |
| <b>3</b> | <b>Comparative analysis</b>                                            | <b>7</b>  |
| 3.1      | Merging samples . . . . .                                              | 7         |
| 3.2      | Sample Correlation . . . . .                                           | 8         |
| 3.3      | Clustering samples . . . . .                                           | 9         |
| 3.4      | Tiling windows analysis . . . . .                                      | 12        |
| 3.5      | Finding differentially methylated bases or regions . . . . .           | 13        |
| 3.5.1    | Finding differentially methylated bases using multiple-cores           | 14        |
| <b>4</b> | <b>Annotating differentially methylated bases or regions</b>           | <b>14</b> |
| 4.1      | Regional analysis . . . . .                                            | 15        |
| 4.2      | Convenience functions for annotation objects . . . . .                 | 16        |
| <b>5</b> | <b>methyKit convenience functions</b>                                  | <b>18</b> |
| 5.1      | coercion . . . . .                                                     | 18        |
| 5.2      | select . . . . .                                                       | 22        |
| 5.3      | reorganize . . . . .                                                   | 23        |
| 5.4      | percMethylation . . . . .                                              | 24        |
| <b>6</b> | <b>Acknowledgements</b>                                                | <b>24</b> |

## 1 Introduction

In this manual, we will show how to use the methylKit package. methylKit is an R package for analysis and annotation of DNA methylation information obtained by high-throughput bisulfite sequencing. The package is designed to deal with sequencing data from RRBS and its variants. But it can potentially handle whole-genome bisulfite sequencing data if proper input format is provided.

### 1.1 DNA methylation

DNA methylation in vertebrates typically occurs at CpG dinucleotides, however non-CpG Cs are also methylated in certain tissues such as embryonic stem cells. DNA Methylation can act as an epigenetic control mechanism for gene regulation. Methylation can hinder binding of transcription factors and/or methylated bases can be bound by methyl-binding-domain proteins which can recruit chromatin remodeling factors. In both cases, the transcription of the regulated gene will be effected. In addition, aberrant DNA methylation patterns have been associated with many human malignancies and can be used in a predictive manner. In malignant tissues, DNA is either hypo-methylated or hyper-methylated compared to the normal tissue. The location of hyper- and hypo-methylated sites gives a distinct signature to many diseases. Traditionally, hypo-methylation is associated with gene transcription (if it is on a regulatory region such as promoters) and hyper-methylation is associated with gene repression.

### 1.2 High-throughput bisulfite sequencing

Bisulfite sequencing is a technique that can determine DNA methylation patterns. The major difference from regular sequencing experiments is that, in bisulfite sequencing DNA is treated with bisulfite which converts cytosine residues to uracil, but leaves 5-methylcytosine residues unaffected. By sequencing and aligning those converted DNA fragments it is possible to call methylation status of a base. Usually, the methylation status of a base determined by a high-throughput bisulfite sequencing will not be a binary score, but it will be a percentage. The percentage simply determines how many of the bases that are aligning to a given cytosine location in the genome have actual C bases in the reads. Since bisulfite treatment leaves methylated Cs intact, that percentage will give us percent methylation score on that base. The reasons why we will not get a binary response are 1) the probable sequencing errors in high-throughput sequencing experiments 2) incomplete bisulfite conversion 3) (and a more likely scenario) is heterogeneity of samples and heterogeneity of paired chromosomes from the same sample

## 2 Basics

### 2.1 Reading the methylation call files

We start by reading in the methylation call data from bisulfite sequencing with `read` function. Reading in the data this way will return a `methylRawList` object which stores methylation information per sample for each covered base. The methylation call files are basically text files that contain percent methylation score per base. A typical methylation call file looks like this:

```
##      chrBase  chr    base strand coverage freqC  freqT
## 1 chr21.9764539 chr21 9764539     R      12 25.00  75.00
## 2 chr21.9764513 chr21 9764513     R      12  0.00 100.00
## 3 chr21.9820622 chr21 9820622     F      13  0.00 100.00
## 4 chr21.9837545 chr21 9837545     F      11  0.00 100.00
## 5 chr21.9849022 chr21 9849022     F     124 72.58  27.42
```

Most of the time bisulfite sequencing experiments have test and control samples. The test samples can be from a disease tissue while the control samples can be from a healthy tissue. You can read a set of methylation call files that have test/control conditions giving `treatment` vector option. For sake of subsequent analysis, `file.list`, `sample.id` and `treatment` option should have the same order. In the following example, first two files are have the sample ids "test1" and "test2" and as determined by `treatment` vector they belong to the same group. The third and fourth files have sample ids "ctrl1" and "ctrl2" and they belong to the same group as indicated by the `treatment` vector.

```
library(methylKit)
file.list <- list(system.file("extdata", "test1.myCpG.txt",
  package = "methylKit"), system.file("extdata",
"test2.myCpG.txt",
  package = "methylKit"), system.file("extdata",
"control1.myCpG.txt",
  package = "methylKit"), system.file("extdata",
"control2.myCpG.txt",
  package = "methylKit"))

# read the files to a methylRawList object: myobj
myobj <- read(file.list, sample.id = list("test1",
  "test2", "ctrl1", "ctrl2"), assembly = "hg18", treatment =
c(1,
  1, 0, 0), context = "CpG")
```

## 2.2 Reading the methylation calls from sorted Bismark alignments

Alternatively, methylation percentage calls can be calculated from sorted SAM file(s) from Bismark aligner and read-in to the memory. Bismark is a popular aligner for bisulfite sequencing reads [1]. `read.bismark` function is designed to read-in Bismark SAM files as `methylRaw` or `methylRawList` objects which store per base methylation calls. SAM files must be sorted by chromosome and read position columns, using 'sort' command in unix-like machines will accomplish such a sort easily.

The following command reads a sorted SAM file and creates a `methylRaw` object for CpG methylation. The user has the option to save the methylation call files to a folder given by `save.folder` option. The saved files can be read-in using the `read` function when needed.

```
my.methRaw <- read.bismark(location = system.file("extdata",
  "test.fastq_bismark.sorted.min.sam", package = "methylKit"),
  sample.id = "test1", assembly = "hg18", read.context = "CpG",
  save.folder = getwd())
```

It is also possible to read multiple SAM files at the same time, check `read.bismark` documentation.

## 2.3 Descriptive statistics on samples

Since we read the methylation data now, we can check the basic stats about the methylation data such as coverage and percent methylation. We now have a `methylRawList` object which contains methylation information per sample. The following command prints out percent methylation statistics for second sample: "test2"

```
getMethylationStats(myobj[[2]], plot = F, both.strands = F)

## methylation statistics per base
## summary:
##   Min. 1st Qu.  Median    Mean 3rd Qu.    Max.
##   0.0   20.0   82.8   63.2   94.7   100.0
## percentiles:
##   0%   10%   20%   30%   40%   50%   60%   70%
##   0.00  0.00  0.00  48.39  70.00  82.79  90.00  93.33
##   80%   90%   95%   99%  99.5%  99.9%  100%
##   96.43 100.00 100.00 100.00 100.00 100.00 100.00
##
```

The following command plots the histogram for percent methylation distribution. The figure below is the histogram and numbers on bars denote what

percentage of locations are contained in that bin. Typically, percent methylation histogram should have two peaks on both ends. In any given cell, any given base are either methylated or not. Therefore, looking at many cells should yield a similar pattern where we see lots of locations with high methylation and lots of locations with low methylation.

```
getMethylationStats(myobj[[2]], plot = T, both.strands = F)
```

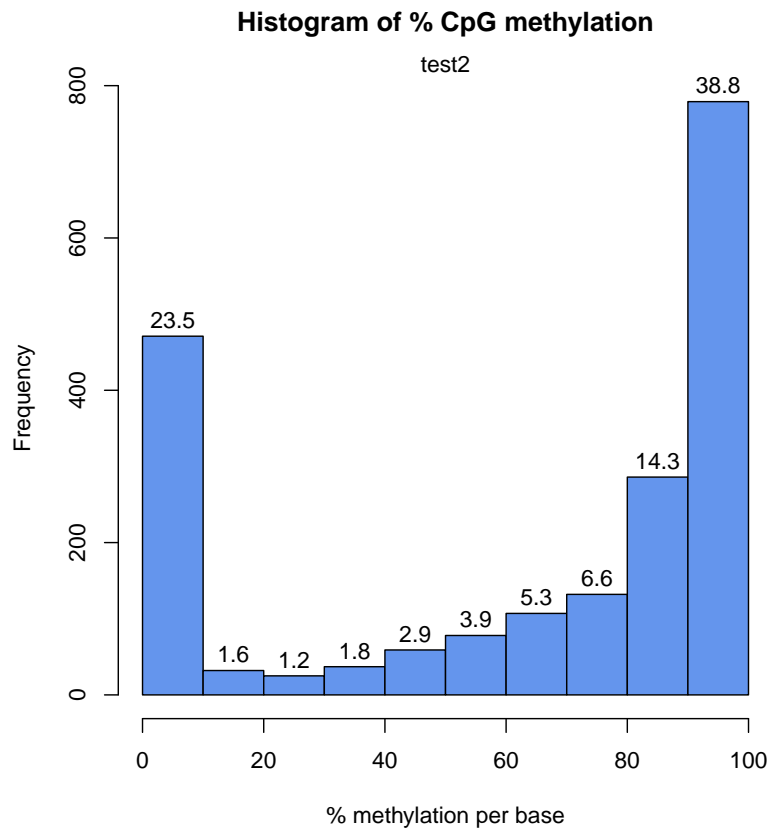

We can also plot the read coverage per base information in a similar way, again numbers on bars denote what percentage of locations are contained in that bin. Experiments that are highly suffering from PCR duplication bias will have a secondary peak towards the right hand side of the histogram.

```
library("graphics")  
getCoverageStats(myobj[[2]], plot = T, both.strands = F)
```

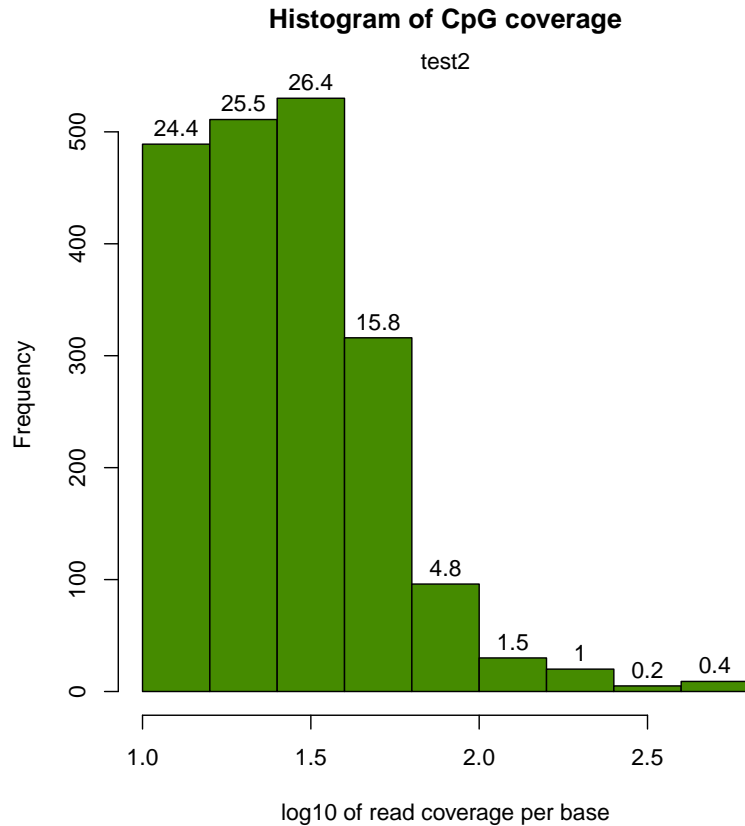

## 2.4 Filtering samples based on read coverage

It might be useful to filter samples based on coverage. Particularly, if our samples are suffering from PCR bias it would be useful to discard bases with very high read coverage. Furthermore, we would also like to discard bases that have low read coverage, a high enough read coverage will increase the power of the statistical tests. The code below filters a `methyRawList` and discards bases that have coverage below 10X and also discards the bases that have more than 99.9th percentile of coverage in each sample.

```
filtered.myobj <- filterByCoverage(myobj, lo.count = 10,
  lo.perc = NULL, hi.count = NULL, hi.perc = 99.9)
```



```
# creates a methylBase object. Only CpGs covered at least
# in 1 sample per group will be returned there were two
# groups defined by the treatment vector given during the
# creation of myobj treatment=c(1,1,0,0)
meth.min <- unite(myobj, min.per.group = 1L)
```

### 3.2 Sample Correlation

We can check the correlation between samples using `getCorrelation`. This function will either plot scatter plot and correlation coefficients or just print a correlation matrix

```
getCorrelation(meth, plot = T)

##          test1 test2 ctrl1 ctrl2
## test1 1.0000 0.9253 0.8768 0.8738
## test2 0.9253 1.0000 0.8792 0.8802
## ctrl1 0.8768 0.8792 1.0000 0.9465
## ctrl2 0.8738 0.8802 0.9465 1.0000
```



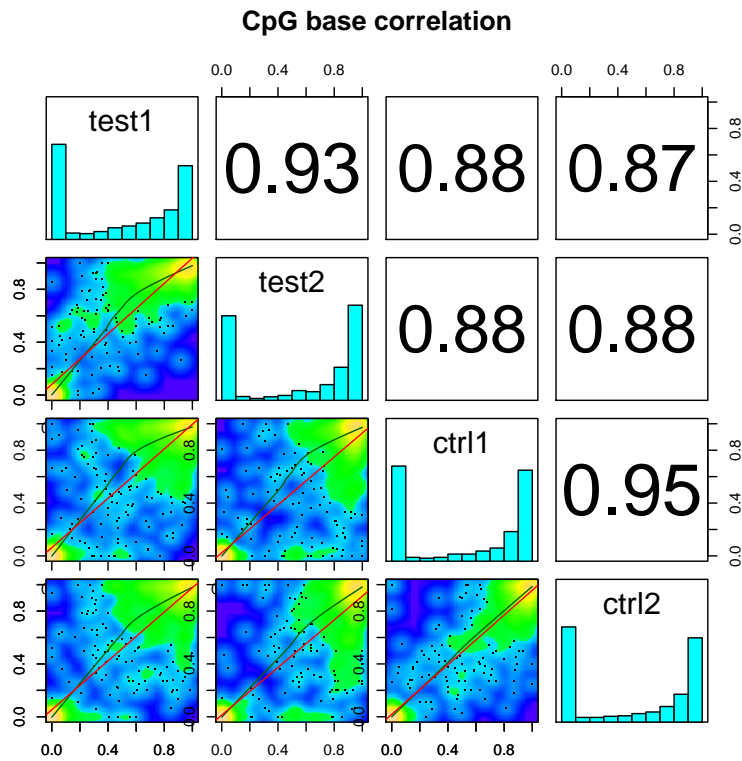

### 3.3 Clustering samples

We can cluster the samples based on the similarity of their methylation profiles. The following function will cluster the samples and draw a dendrogram.

```
clusterSamples(meth, dist = "correlation", method = "ward",
               plot = TRUE)
```

## CpG methylation clustering

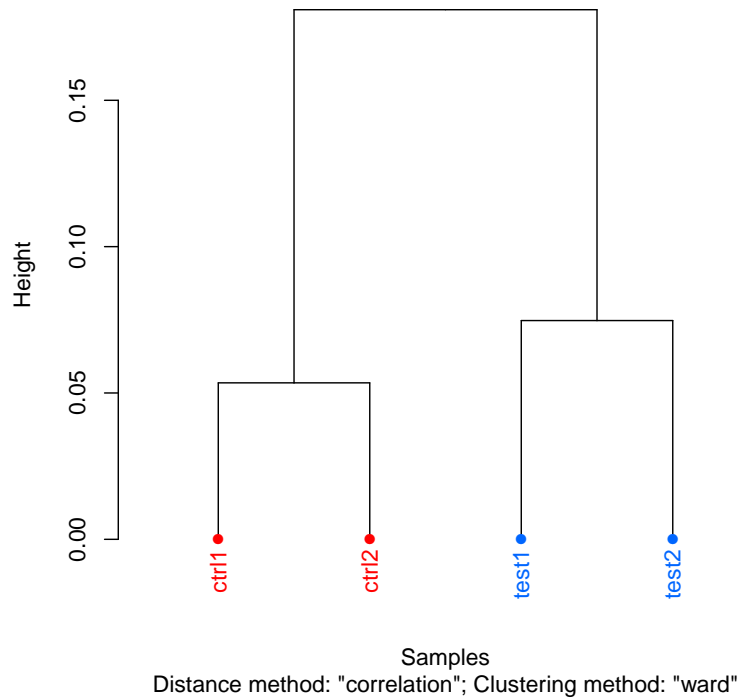

```
##  
## Call:  
## hclust(d = d, method = HCLUST.METHODS[hclust.method])  
##  
## Cluster method   : ward  
## Distance         : pearson  
## Number of objects: 4  
##
```

Setting the `plot=FALSE` will return a dendrogram object which can be manipulated by users or fed in to other user functions that can work with dendrograms.

```
hc <- clusterSamples(meth, dist = "correlation", method = "ward",  
plot = FALSE)
```

We can also do a PCA analysis on our samples. The following function will plot a scree plot for importance of components.

```
PCASamples(meth, screeplot = TRUE)
```

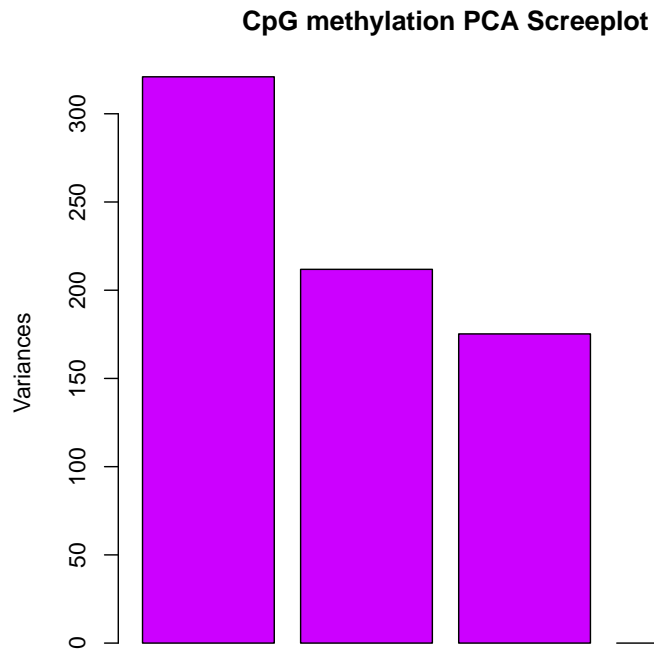

We can also plot PC1 and PC2 axis and a scatter plot of our samples on those axis which will reveal how they cluster.

```
PCASamples(meth)
```

### CpG methylation PCA Analysis

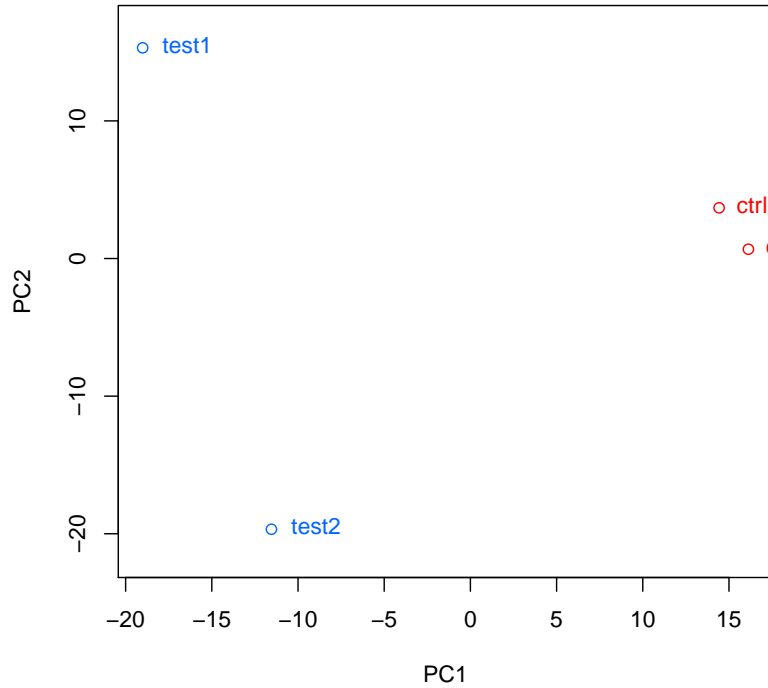

### 3.4 Tiling windows analysis

For some situations, it might be desirable to summarize methylation information over tiling windows rather than doing base-pair resolution analysis. `methylKit` provides functionality to do such analysis. The function below tiles the genome with windows 1000bp length and 1000bp step-size and summarizes the methylation information on those tiles. In this case, it returns a `methylRawList` object which can be fed into `unite` and `calculateDiffMeth` functions consecutively to get differentially methylated regions.

```
tiles <- tileMethylCounts(myobj, win.size = 1000,
  step.size = 1000)
head(tiles[[1]])
```

| ##   |                       | id    | chr     | start   | end | strand |
|------|-----------------------|-------|---------|---------|-----|--------|
| ## 1 | chr21.9764001.9765000 | chr21 | 9764001 | 9765000 | *   |        |
| ## 2 | chr21.9820001.9821000 | chr21 | 9820001 | 9821000 | *   |        |
| ## 3 | chr21.9837001.9838000 | chr21 | 9837001 | 9838000 | *   |        |
| ## 4 | chr21.9849001.9850000 | chr21 | 9849001 | 9850000 | *   |        |

```
## 5 chr21.9853001.9854000 chr21 9853001 9854000 *
## 6 chr21.9860001.9861000 chr21 9860001 9861000 *
## coverage numCs numTs
## 1 24 3 21
## 2 13 0 13
## 3 11 0 11
## 4 124 90 34
## 5 34 22 12
## 6 39 38 1
```

### 3.5 Finding differentially methylated bases or regions

`calculateDiffMeth()` function is the main function to calculate differential methylation. Depending on the sample size per each set it will either use Fisher's exact or logistic regression to calculate P-values. P-values will be adjusted to Q-values using SLIM method [2].

```
myDiff <- calculateDiffMeth(meth)
```

After q-value calculation, we can select the differentially methylated regions/bases based on q-value and percent methylation difference cutoffs. Following bit selects the bases that have q-value $\leq$ 0.01 and percent methylation difference larger than 25%. If you specify `type="hyper"` or `type="hypo"` options, you will get hyper-methylated or hypo-methylated regions/bases.

```
# get hyper methylated bases
myDiff25p.hyper <- get.methylDiff(myDiff, difference = 25,
  qvalue = 0.01, type = "hyper")
# get hypo methylated bases
myDiff25p.hypo <- get.methylDiff(myDiff, difference = 25,
  qvalue = 0.01, type = "hypo")
#
#
# get all differentially methylated bases
myDiff25p <- get.methylDiff(myDiff, difference = 25,
  qvalue = 0.01)
```

We can also visualize the distribution of hypo/hyper-methylated bases/regions per chromosome using the following function. In this case, the example set includes only one chromosome. The `list` shows percentages of hypo/hyper methylated bases over all the covered bases in a given chromosome.

```
diffMethPerChr(myDiff, plot = FALSE, qvalue.cutoff = 0.01,
  meth.cutoff = 25)
```

```
## $diffMeth.per.chr
##   chr number.of.hypomethylated
## 1 chr21                        59
##   percentage.of.hypomethylated number.of.hypermethylated
## 1                               6.127                      75
##   percentage.of.hypermethylated
## 1                               7.788
##
## $diffMeth.all
##   percentage.of.hypermethylated number.of.hypermethylated
## 1                               7.788                      75
##   percentage.of.hypomethylated number.of.hypomethylated
## 1                               6.127                      59
##
```

### 3.5.1 Finding differentially methylated bases using multiple-cores

The differential methylation calculation speed can be increased substantially by utilizing multiple-cores in a machine if available. Both Fisher's Exact test and logistic regression based test are able to use multiple-core option.

The following piece of code will run differential methylation calculation using 2 cores.

```
myDiff <- calculateDiffMeth(meth, num.cores = 2)
```

## 4 Annotating differentially methylated bases or regions

We can annotate our differentially methylated regions/bases based on gene annotation. In this example, we read the gene annotation from a bed file and annotate our differentially methylated regions with that information. This will tell us what percentage of our differentially methylated regions are on promoters/introns/exons/intergenic region. Similar gene annotation can be fetched using `GenomicFeatures` package available from Bioconductor.org.

```
gene.obj <- read.transcript.features(system.file("extdata",
  "refseq.hg18.bed.txt", package = "methylKit"))
# annotate differentially methylated Cs with
# promoter/exon/intron using annotation data
annotate.WithGenicParts(myDiff25p, gene.obj)

## summary of target set annotation with genic parts
## 133 rows in target set
```

```

## -----
## -----
## percentage of target features overlapping with annotation :
##   promoter      exon      intron intergenic
##     27.82      15.04      34.59      57.14
##
##
## percentage of target features overlapping with annotation (with promoter>exon>intron pre
##   promoter      exon      intron intergenic
##     27.82       0.00      15.04      57.14
##
##
## percentage of annotation boundaries with feature overlap :
## promoter      exon      intron
## 0.28604 0.02683 0.17068
##
##
## summary of distances to the nearest TSS :
##   Min. 1st Qu.  Median    Mean 3rd Qu.    Max.
##      5      828   45200   52000   94600   314000

```

Similarly, we can read the CpG island annotation and annotate our differentially methylated bases/regions with them.

```

# read the shores and flanking regions and name the flanks
# as shores and CpG islands as CpGi
cpg.obj <- read.feature.flank(system.file("extdata",
    "cpgi.hg18.bed.txt", package = "methylKit"),
    feature.flank.name = c("CpGi",
        "shores"))
#
diffCpGann <- annotate.WithFeature.Flank(myDiff25p,
    cpg.obj$CpGi, cpg.obj$shores, feature.name = "CpGi",
    flank.name = "shores")

```

## 4.1 Regional analysis

We can also summarize methylation information over a set of defined regions such as promoters or CpG islands. The function below summarizes the methylation information over a given set of promoter regions and outputs a `methylRaw` or `methylRawList` object depending on the input.

```

promoters <- regionCounts(myobj, gene.obj$promoters)

head(promoters[[1]])

```

```
##          id chr start end strand
## 1 chr21.17806094.17808094.NA chr21 17806094 17808094 +
## 2 chr21.10119796.10121796.NA chr21 10119796 10121796 -
## 3 chr21.10011791.10013791.NA chr21 10011791 10013791 -
## 4 chr21.10119808.10121808.NA chr21 10119808 10121808 -
## 5 chr21.15357997.15359997.NA chr21 15357997 15359997 -
## 6 chr21.16023366.16025366.NA chr21 16023366 16025366 +
## coverage numCs numTs
## 1 1834 7 1827
## 2 79 44 35
## 3 3697 2982 715
## 4 79 44 35
## 5 8613 16 8594
## 6 6296 5 6291
```

## 4.2 Convenience functions for annotation objects

After getting the annotation of differentially methylated regions, we can get the distance to TSS and nearest gene name using the `getAssociationWithTSS` function.

```
diffAnn <- annotate.WithGenicParts(myDiff25p, gene.obj)

# target.row is the row number in myDiff25p
head(getAssociationWithTSS(diffAnn))

## target.row dist.to.feature feature.name feature.strand
## 60 1 951 NM_199260 -
## 60.1 2 931 NM_199260 -
## 60.2 3 838 NM_199260 -
## 60.3 4 828 NM_199260 -
## 60.4 5 802 NM_199260 -
## 60.5 6 723 NM_199260 -
```

It is also desirable to get percentage/number of differentially methylated regions that overlap with intron/exon/promoters

```
getTargetAnnotationStats(diffAnn, percentage = TRUE,
  precedence = TRUE)

## promoter exon intron intergenic
## 27.82 0.00 15.04 57.14
```

We can also plot the percentage of differentially methylated bases overlapping with exon/intron/promoters



```
plotTargetAnnotation(diffAnn, precedence = TRUE, main =  
"differential methylation annotation")
```

### differential methylation annotation

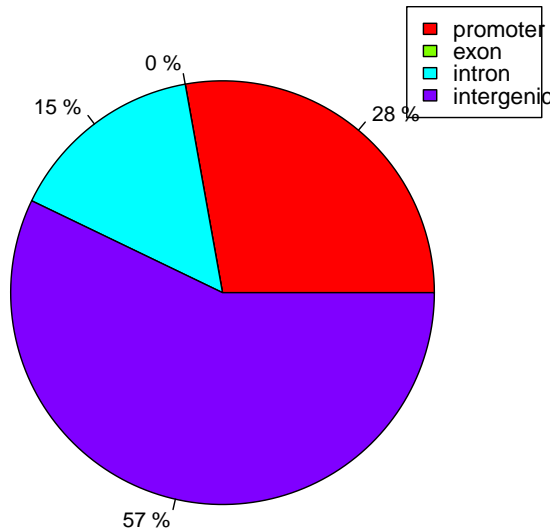

We can also plot the CpG island annotation the same way. The plot below shows what percentage of differentially methylated bases are on CpG islands, CpG island shores and other regions.

```
plotTargetAnnotation(diffCpGann, col = c("green",  
"gray", "white"), main = "differential methylation  
annotation")
```

## differential methylation annotation

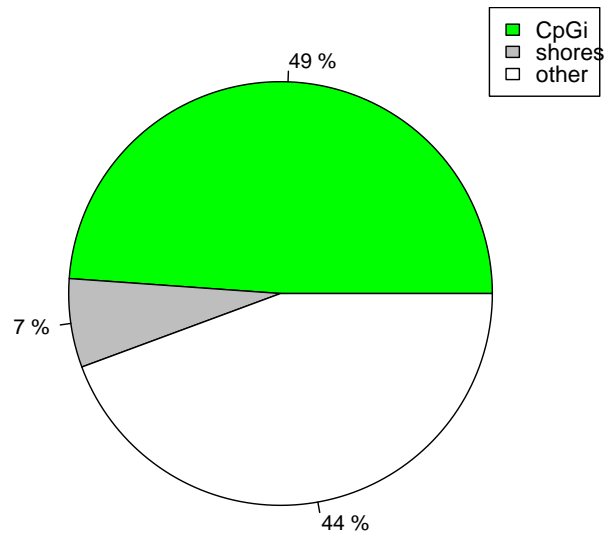

It might be also useful to get percentage of intron/exon/promoters that overlap with differentially methylated bases.

```
getFeatsWithTargetsStats(diffAnn, percentage = TRUE)
## promoter    exon    intron
## 0.28604    0.02683  0.17068
```

## 5 methylKit convenience functions

### 5.1 coercion

Most `methylKit` objects (`methylRaw`, `methylBase` and `methylDiff`) can be coerced to `GRanges` objects from `GenomicRanges` package. Coercing `methylKit` objects to `GRanges` will give users additional flexibility when customising their analyses.

```

class(meth)

## [1] "methylBase"
## attr(,"package")
## [1] "methylKit"

as(meth, "GRanges")

## GRanges with 963 ranges and 13 elementMetadata cols:
##      seqnames          ranges strand |
##      <Rle>             <IRanges> <Rle> |
## [1] chr21 [10011833, 10011833]      + |
## [2] chr21 [10011841, 10011841]      + |
## [3] chr21 [10011855, 10011855]      + |
## [4] chr21 [10011858, 10011858]      + |
## [5] chr21 [10011861, 10011861]      + |
## [6] chr21 [10011872, 10011872]      + |
## [7] chr21 [10011876, 10011876]      + |
## [8] chr21 [10011878, 10011878]      + |
## [9] chr21 [10011925, 10011925]      - |
## ...      ...      ...      ...
## [955] chr21 [9944505, 9944505]      + |
## [956] chr21 [9944663, 9944663]      - |
## [957] chr21 [9959407, 9959407]      + |
## [958] chr21 [9959541, 9959541]      - |
## [959] chr21 [9959569, 9959569]      - |
## [960] chr21 [9959577, 9959577]      - |
## [961] chr21 [9959644, 9959644]      - |
## [962] chr21 [9959650, 9959650]      - |
## [963] chr21 [9967634, 9967634]      - |
##      id coverage1      numCs1      numTs1
##      <factor> <integer> <numeric> <numeric>
## [1] chr21.10011833      174      173      1
## [2] chr21.10011841      173      164      9
## [3] chr21.10011855      175      175      0
## [4] chr21.10011858      175      131     44
## [5] chr21.10011861      174      147     27
## [6] chr21.10011872      167      160      7
## [7] chr21.10011876      160      148     12
## [8] chr21.10011878      150      134     16
## [9] chr21.10011925      120       65     55
## ...      ...      ...      ...
## [955] chr21.9944505      37       2     35
## [956] chr21.9944663      61      19     42
## [957] chr21.9959407      44      17     27
## [958] chr21.9959541      26      12     14

```

```

## [959] chr21.9959569      25      17      8
## [960] chr21.9959577      25      25      0
## [961] chr21.9959644      21       0     21
## [962] chr21.9959650      21       6     15
## [963] chr21.9967634      10       0     10
##      coverage2   numCs2   numTs2 coverage3   numCs3
##      <integer> <numeric> <numeric> <integer> <numeric>
## [1]      18      18       0      40      34
## [2]      20      19       1      40      18
## [3]      21      21       0      39      29
## [4]      21      20       1      39      31
## [5]      20      15       5      39      13
## [6]      20      19       1      39      34
## [7]      21      18       3      38      24
## [8]      20      19       1      37      20
## [9]      37      21      16      68      21
## ...      ...      ...      ...      ...
## [955]     147      56      91      86      79
## [956]     116      71      45      45      35
## [957]     118      58      60      52      49
## [958]      76      44      32      39      37
## [959]      77      69       8      40      40
## [960]      77      71       6      40      40
## [961]      97      50      47      59      52
## [962]     103      57      46      59      51
## [963]      61      25      36      93      62
##      numTs3 coverage4   numCs4   numTs4
##      <numeric> <integer> <numeric> <numeric>
## [1]      6      14      14       0
## [2]     22      14       8       6
## [3]     10      14      12       2
## [4]      8      13       8       5
## [5]     26      13       9       4
## [6]      5      14       8       6
## [7]     14      11       9       2
## [8]     17      12      12       0
## [9]     47      20       6      14
## ...      ...      ...      ...
## [955]      7      40      25      15
## [956]     10      31      25       6
## [957]      3      40      27      13
## [958]      2      39      32       7
## [959]      0      39      35       4
## [960]      0      39      36       3
## [961]      7      31      14      17

```

```

## [962]      8      32      21      11
## [963]     31      56      29      27
## ---
## seqlengths:
## chr21
## NA

class(myDiff)

## [1] "methylDiff"
## attr(,"package")
## [1] "methylKit"

as(myDiff, "GRanges")

## GRanges with 963 ranges and 3 elementMetadata cols:
##      seqnames      ranges strand |
##      <Rle>         <IRanges> <Rle> |
## [1] chr21 [10011833, 10011833] + |
## [2] chr21 [10011841, 10011841] + |
## [3] chr21 [10011855, 10011855] + |
## [4] chr21 [10011858, 10011858] + |
## [5] chr21 [10011861, 10011861] + |
## [6] chr21 [10011872, 10011872] + |
## [7] chr21 [10011876, 10011876] + |
## [8] chr21 [10011878, 10011878] + |
## [9] chr21 [10011925, 10011925] - |
## ...      ...      ...      ...
## [955] chr21 [9944505, 9944505] + |
## [956] chr21 [9944663, 9944663] - |
## [957] chr21 [9959407, 9959407] + |
## [958] chr21 [9959541, 9959541] - |
## [959] chr21 [9959569, 9959569] - |
## [960] chr21 [9959577, 9959577] - |
## [961] chr21 [9959644, 9959644] - |
## [962] chr21 [9959650, 9959650] - |
## [963] chr21 [9967634, 9967634] - |
##      id      qvalue meth.diff
##      <factor> <numeric> <numeric>
## [1] chr21.10011833 8.543e-04 10.590
## [2] chr21.10011841 6.050e-13 46.671
## [3] chr21.10011855 4.579e-09 22.642
## [4] chr21.10011858 5.922e-01 2.041
## [5] chr21.10011861 8.163e-08 41.197
## [6] chr21.10011872 1.238e-03 16.477
## [7] chr21.10011876 1.933e-04 24.366

```

```
##      [8] chr21.10011878 3.489e-04 24.694
##      [9] chr21.10011925 8.543e-04 24.095
##      ...      ...      ...      ...
## [955] chr21.9944505 0.000e+00 -51.018
## [956] chr21.9944663 7.678e-05 -28.100
## [957] chr21.9959407 4.839e-08 -36.312
## [958] chr21.9959541 3.145e-06 -33.560
## [959] chr21.9959569 3.702e-02 -10.623
## [960] chr21.9959577 4.923e-01 -2.085
## [961] chr21.9959644 3.291e-05 -30.960
## [962] chr21.9959650 6.575e-05 -28.314
## [963] chr21.9967634 1.028e-03 -25.863
## ---
## seqlengths:
## chr21
## NA
```

## 5.2 select

We can also select rows from `methylRaw`, `methylBase` and `methylDiff` objects with "select" function. An appropriate `methylKit` object will be returned as a result of "select" function.

```
select(meth, 1:10) # select first 10 rows of a methylBase object
##      id chr start end strand coverage1
## 1 chr21.10011833 chr21 10011833 10011833 + 174
## 2 chr21.10011841 chr21 10011841 10011841 + 173
## 3 chr21.10011855 chr21 10011855 10011855 + 175
## 4 chr21.10011858 chr21 10011858 10011858 + 175
## 5 chr21.10011861 chr21 10011861 10011861 + 174
## 6 chr21.10011872 chr21 10011872 10011872 + 167
## 7 chr21.10011876 chr21 10011876 10011876 + 160
## 8 chr21.10011878 chr21 10011878 10011878 + 150
## 9 chr21.10011925 chr21 10011925 10011925 - 120
## 10 chr21.10011938 chr21 10011938 10011938 - 134
## numCs1 numTs1 coverage2 numCs2 numTs2 coverage3 numCs3
## 1 173 1 18 18 0 40 34
## 2 164 9 20 19 1 40 18
## 3 175 0 21 21 0 39 29
## 4 131 44 21 20 1 39 31
## 5 147 27 20 15 5 39 13
## 6 160 7 20 19 1 39 34
## 7 148 12 21 18 3 38 24
## 8 134 16 20 19 1 37 20
```

```

## 9      65      55      37      21      16      68      21
## 10     127      7      36      34      2      74      64
##      numTs3 coverage4 numCs4 numTs4
## 1       6       14      14      0
## 2      22      14      8       6
## 3      10      14      12      2
## 4       8      13      8       5
## 5      26      13      9       4
## 6       5      14      8       6
## 7      14      11      9       2
## 8      17      12      12      0
## 9      47      20      6       14
## 10     10      20      17      3

select(myDiff, 20:30) # select rows 10 of a methylDiff object

##          id  chr  start  end strand  pvalue
## 20 chr21.10012079 chr21 10012079 10012079 + 1.325e-07
## 21 chr21.10012089 chr21 10012089 10012089 + 6.797e-02
## 22 chr21.10012095 chr21 10012095 10012095 + 9.125e-02
## 23 chr21.10012101 chr21 10012101 10012101 + 8.882e-16
## 24 chr21.10012696 chr21 10012696 10012696 + 2.253e-03
## 25 chr21.10012699 chr21 10012699 10012699 + 1.783e-09
## 26 chr21.10012876 chr21 10012876 10012876 + 4.251e-01
## 27 chr21.10012881 chr21 10012881 10012881 + 1.000e+00
## 28 chr21.10012883 chr21 10012883 10012883 + 4.287e-01
## 29 chr21.10012887 chr21 10012887 10012887 + 1.645e-02
## 30 chr21.10012891 chr21 10012891 10012891 + 8.591e-01
##          qvalue meth.diff
## 20 1.050e-06      26.617
## 21 1.048e-01      9.564
## 22 1.324e-01      5.726
## 23 4.221e-14     39.808
## 24 6.033e-03      9.685
## 25 1.955e-08     44.703
## 26 4.224e-01      3.888
## 27 5.922e-01      0.000
## 28 4.252e-01      3.750
## 29 3.316e-02     20.808
## 30 5.922e-01      0.686

```

### 5.3 reorganize

`methylBase` and `methylRawList` can be reorganized by `reorganize` function. The function can subset the objects based on provided sample ids, it also cre-

ates a new treatment vector determining which samples belong to which group. Order of sample ids should match the treatment vector order.

```
# creates a new methylRawList object
myobj2 <- reorganize(myobj, sample.ids = c("test1",
    "ctrl2"), treatment = c(1, 0))
# creates a new methylBase object
meth2 <- reorganize(meth, sample.ids = c("test1",
    "ctrl2"), treatment = c(1, 0))
```

## 5.4 percMethylation

Percent methylation values can be extracted from methylBase object by using percMethylation function.

```
# creates a matrix containing percent methylation values
perc.meth <- percMethylation(meth)
```

## 6 Acknowledgements

This package is developed at Weill Cornell Medical College by Altuna Akalin with important code contributions from Sheng Li and Matthias Kormaksson. We wish to thank especially Maria E. Figueroa, Francine Garret-Bakelman, Christopher Mason and Ari Melnick for their contribution of ideas and support. Their support and discussions lead to development of methylKit.

## 7 R session info

```
sessionInfo()

## R version 2.15.0 (2012-03-30)
## Platform: x86_64-apple-darwin9.8.0/x86_64 (64-bit)
##
## locale:
## [1] en_US.UTF-8/en_US.UTF-8/en_US.UTF-8/C/en_US.UTF-8/en_US.UTF-8
##
## attached base packages:
## [1] stats      graphics  grDevices  utils      datasets
## [6] methods   base
##
## other attached packages:
## [1] data.table_1.8.0 methylKit_0.5   knitr_0.4
```



```
##
## loaded via a namespace (and not attached):
## [1] BiocGenerics_0.2.0  codetools_0.2-8
## [3] digest_0.5.2        evaluate_0.4.2
## [5] formatR_0.4         GenomicRanges_1.8.3
## [7] highlight_0.3.1     IRanges_1.14.2
## [9] KernSmooth_2.23-7   parallel_2.15.0
## [11] parser_0.0-14       plyr_1.7.1
## [13] Rcpp_0.9.10         stats4_2.15.0
## [15] stringr_0.6         tools_2.15.0
```

## References

- [1] Felix Krueger and Simon R Andrews. Bismark: a flexible aligner and methylation caller for Bisulfite-Seq applications. *Bioinformatics (Oxford, England)*, 27(11):1571–2, June 2011.
- [2] Hong-Qiang Wang, Lindsey K Tuominen, and Chung-Jui Tsai. SLIM: a sliding linear model for estimating the proportion of true null hypotheses in datasets with dependence structures. *Bioinformatics (Oxford, England)*, 27(2):225–31, January 2011.
