# Supplementary material for: methylKit: a comprehensive R package for the analysis of genome-wide DNA methylation profiles
Source: PubMed Central journal article supplement (PMC3491415; doi:10.1186/gb-2012-13-10-r87), 2012-10-03
Supplement: gb-2012-13-10-r87-S3.pdf [file gb-2012-13-10-r87-S3.pdf]

# Package ‘methyKit’

June 28, 2012

**Type** Package

**Title** DNA methylation analysis from high-throughput bisulfite sequencing results

**Version** 0.5.3

**Date** 2012-06-16

**Author** Altuna Akalin, Matthias Kormaksson, Sheng Li

**Maintainer** Altuna Akalin <aakalin@gmail.com>

**Description** DNA methylation analysis RRBS,ERRBS,BS-seq

**License** Artistic-2.0

**LazyLoad** yes

**Depends** R (>= 2.15.0), methods

**Imports** GenomicRanges, IRanges, data.table, parallel

**Suggests** testthat

**Collate**

‘backbone.R’ ‘diffMeth.R’ ‘annotate.R’ ‘clusterSamples.R’ ‘regionalize.R’ ‘read.bismark.R’ ‘document\_data.R’ ‘bedgr

## R topics documented:

|                                        |    |
|----------------------------------------|----|
| annotate.WithFeature . . . . .         | 2  |
| annotate.WithFeature.Flank . . . . .   | 3  |
| annotate.WithGenicParts . . . . .      | 4  |
| annotationByFeature-class . . . . .    | 4  |
| annotationByGenicParts-class . . . . . | 5  |
| bedgraph . . . . .                     | 5  |
| calculateDiffMeth . . . . .            | 6  |
| clusterSamples . . . . .               | 6  |
| convert.bed.df . . . . .               | 7  |
| convert.bed2exons . . . . .            | 8  |
| convert.bed2introns . . . . .          | 8  |
| diffMethPerChr . . . . .               | 9  |
| filterByCoverage . . . . .             | 9  |
| get.methylDiff . . . . .               | 10 |

|                                    |    |
|------------------------------------|----|
| getAssembly . . . . .              | 11 |
| getAssociationWithTSS . . . . .    | 11 |
| getContext . . . . .               | 11 |
| getCorrelation . . . . .           | 12 |
| getCoverageStats . . . . .         | 12 |
| getData . . . . .                  | 13 |
| getFeatsWithTargetsStats . . . . . | 13 |
| getFlanks . . . . .                | 14 |
| getMembers . . . . .               | 14 |
| getMethylationStats . . . . .      | 15 |
| getTargetAnnotationStats . . . . . | 15 |
| methylBase-class . . . . .         | 16 |
| methylBase.obj . . . . .           | 16 |
| methylDiff-class . . . . .         | 17 |
| methylDiff.obj . . . . .           | 17 |
| methylRaw-class . . . . .          | 17 |
| methylRawList-class . . . . .      | 18 |
| methylRawList.obj . . . . .        | 18 |
| normalizeCoverage . . . . .        | 18 |
| PCASamples . . . . .               | 19 |
| percMethylation . . . . .          | 20 |
| plotTargetAnnotation . . . . .     | 20 |
| pool . . . . .                     | 21 |
| read . . . . .                     | 21 |
| read.bed . . . . .                 | 22 |
| read.bismark . . . . .             | 23 |
| read.feature.flank . . . . .       | 24 |
| read.transcript.features . . . . . | 25 |
| regionCounts . . . . .             | 25 |
| reorganize . . . . .               | 26 |
| select . . . . .                   | 27 |
| show . . . . .                     | 27 |
| tileMethylCounts . . . . .         | 27 |
| unite . . . . .                    | 28 |

## **Index** **29**

---

annotate.WithFeature *function to annotate given GRanges object with a given genomic feature*

---

### **Description**

function to annotate given GRanges object with a given genomic feature

### **Usage**

```
annotate.WithFeature(target, feature, strand=FALSE, extend=0, feature.name="feat1")
```

**Arguments**

|              |                                                                                                        |
|--------------|--------------------------------------------------------------------------------------------------------|
| target       | a GRanges/or methylDiff object storing chromosome locations to be annotated                            |
| feature      | a GRanges object storing chromosome locations of a feature (can be CpG islands, ChIP-seq peaks, etc)   |
| strand       | If set to TRUE, annotation features and target features will be overlapped based on strand (def:FALSE) |
| extend       | specifying a positive value will extend the feature on both sides as much as extend                    |
| feature.name | name of the annotation feature. For example: H3K4me1,CpGisland etc.                                    |

**Value**

returns an annotationByFeature object

---

annotate.WithFeature.Flank

*function to annotate given GRanges object with promoter,exon,intron & intergenic values*

---

**Description**

function to annotate given GRanges object with promoter,exon,intron & intergenic values

**Usage**

```
annotate.WithFeature.Flank(target, feature, flank, feature.name="feat", flank.name="flank", strand=
```

**Arguments**

|              |                                                                                                        |
|--------------|--------------------------------------------------------------------------------------------------------|
| target       | a methylDiff or a granges object storing chromosome locations to be annotated                          |
| feature      | a granges object storing chromosome locations of a feature (can be CpG islands, ChIP-seq peaks, etc)   |
| flank        | a granges object storing chromosome locations of the flanks of the feature                             |
| feature.name | string for the name of the feature                                                                     |
| flank.name   | string for the name o                                                                                  |
| strand       | If set to TRUE, annotation features and target features will be overlapped based on strand (def:FALSE) |

**Value**

returns an annotationByFeature object

**Examples**

```
data(methylKit)
cpg.obj=read.feature.flank(system.file("extdata", "cpgi.hg18.bed.txt", package = "methylKit"),feature.flank=
annotate.WithFeature.Flank(methylDiff.obj, cpg.obj$CpGi, cpg.obj$shores)
```

---

```
annotate.WithGenicParts
```

*function to annotate given GRanges object with promoter,exon,intron & intergenic values*

---

### Description

function to annotate given GRanges object with promoter,exon,intron & intergenic values

### Usage

```
annotate.WithGenicParts(target,GRangesList.obj,strand=FALSE)
```

### Arguments

`target` : a methylDiff or a granges object storing chromosome locations to be annotated  
`GRangesList.obj` : A GRangesList object containing GRanges object for promoter,exons,introns and TSSes, or simply output of read.transcript.features function  
`strand` : If set to TRUE, annotation features and target features will be overlapped based on strand (def:FALSE)

### Value

annotationByGenicParts object

### Examples

```
data(methylKit)
gene.obj=read.transcript.features(system.file("extdata", "refseq.hg18.bed.txt", package = "methylKit"))
annotate.WithGenicParts(methylDiff.obj,gene.obj)
```

---

```
annotationByFeature-class
```

*An S4 class that information on overlap of target features with annotation features*

---

### Description

This object is desgined to hold statistics and information about genomic feature overlaps

### Slots

`members` a matrix showing overlap of target features with annotation genomic features  
`annotation` a named vector of percentages  
`precedence` a named vector of percentages  
`num.hierarchica` vector  
`no.of.OlapFeat` vector  
`perc.of.OlapFeat` vector

annotationByGenicParts-class

*An S4 class that information on overlap of target features with annotation features*

### Description

This object is designed to hold statistics and information about genomic feature overlaps

### Slots

members a matrix showing overlap of target features with annotation genomic features  
 annotation a named vector of percentages  
 precedence a named vector of percentages  
 num.hierarchica vector  
 no.of.OlapFeat vector  
 perc.of.OlapFeat vector  
**dist.to.TSS** a data frame showing distances to TSS and gene/TSS names and strand

bedgraph

*GETs bedgraph from methylRaw, methylRawList and methylDiff objects*

### Description

Convert methylRaw, methylRawList or methylDiff object into a bedgraph format

### Usage

```
bedgraph(methylObj, file.name=NULL, col.name, unmeth=FALSE, log.transform=FALSE, negative=FALSE, add.on)
```

### Arguments

|               |                                                                                                                                                                                                                                                                                                               |
|---------------|---------------------------------------------------------------------------------------------------------------------------------------------------------------------------------------------------------------------------------------------------------------------------------------------------------------|
| methylObj     | a methylRaw or methylRawList object                                                                                                                                                                                                                                                                           |
| file.name     | Default: NULL, if given a bedgraph file will be written, if NULL a data.frame or a list of data frames will be returned                                                                                                                                                                                       |
| col.name      | name of the column in methylRaw, methylRawList or methylDiff objects to be used as a score for the bedgraph. For methylDiff, col.name must be one of the following 'pvalue', 'qvalue', 'meth.diff'. For methylRaw and methylRawList it must be one of the following 'coverage', 'numCs', 'numTs', 'perc.meth' |
| unmeth        | when working with methylRaw or methylRawList objects should you output unmethylated C percentage this makes it easier to see the unmethylated bases because their will be zero. Only invoked when file.name is not NULL.                                                                                      |
| log.transform | Default FALSE, If TRUE the score column of the bedgraph will be in log10 scale. Ignored when col.name='perc.meth'                                                                                                                                                                                             |
| negative      | Default FALSE, If TRUE, the score column of the bedgraph will be multiplied by -1. Ignored when col.name='perc.meth'                                                                                                                                                                                          |
| add.on        | additional string to be add on the track line of bedgraph. can be viewlimits,priority etc. Check bedgraph track line options at UCSC browser                                                                                                                                                                  |

**Value**

RETURNS a data.frame or list of data.frames if file.name=NULL, if a file.name given appropriate bed file will be written to that file

---

|                   |                                                       |
|-------------------|-------------------------------------------------------|
| calculateDiffMeth | <i>Calculates differential methylation statistics</i> |
|-------------------|-------------------------------------------------------|

---

**Description**

Calculates differential methylation statistics

**Usage**

```
calculateDiffMeth(.Object, slim=TRUE, weighed.mean=TRUE, num.cores=1)
```

**Arguments**

|              |                                                                                                                                                  |
|--------------|--------------------------------------------------------------------------------------------------------------------------------------------------|
| .Object      | a methylBase object to calculate differential methylation                                                                                        |
| slim         | If TRUE(default) SLIM method will be used for P-value adjustment.If FALSE, p.adjust with method="BH" option will be used for P-value correction. |
| weighed.mean | calculate the mean methylation difference between groups using read coverage as weights                                                          |
| num.cores    | integer for denoting how many cores should be used for differential methylation calculations (only can be used in machines with multiple cores)  |

**Value**

a methylDiff object containing the differential methylation statistics and locations

**Note**

The function either uses a logistic regression (when there are multiple samples per group) or fisher's exact when there is one sample per group.

---

|                |                                                                   |
|----------------|-------------------------------------------------------------------|
| clusterSamples | <i>CpG Dinucleotide Methylation Hierarchical Cluster Analysis</i> |
|----------------|-------------------------------------------------------------------|

---

**Description**

CpG Dinucleotide Methylation Hierarchical Cluster Analysis

**Usage**

```
clusterSamples(.Object, dist="correlation",
method="ward", plot=TRUE)
```

**Arguments**

|         |                                                                                                                                                                                                               |
|---------|---------------------------------------------------------------------------------------------------------------------------------------------------------------------------------------------------------------|
| .Object | a methylBase object                                                                                                                                                                                           |
| dist    | the distance measure to be used. This must be one of "correlation", "euclidean", "maximum", "manhattan", "canberra", "binary" or "minkowski". Any unambiguous substring can be given. (default:"correlation") |
| method  | the agglomeration method to be used. This should be (an unambiguous abbreviation of) one of "ward", "single", "complete", "average", "mcquitty", "median" or "centroid". (default:"ward")                     |
| plot    | a logical value indicating whether to plot hierarchical clustering. (default:TRUE)                                                                                                                            |

**Value**

a tree object of a hierarchical cluster analysis using a set of dissimilarities for the n objects being clustered.

---

|                |                                                                         |
|----------------|-------------------------------------------------------------------------|
| convert.bed.df | <i>convert a data frame read-in from a bed file to a GRanges object</i> |
|----------------|-------------------------------------------------------------------------|

---

**Description**

convert a data frame read-in from a bed file to a GRanges object

**Usage**

```
convert.bed.df (bed)
```

**Arguments**

|     |                                                                                  |
|-----|----------------------------------------------------------------------------------|
| bed | a data.frame where column order and content resembles a bed file with 12 columns |
|-----|----------------------------------------------------------------------------------|

**Value**

GRanges object

**Note**

one bed track per file is only accepted, the bed files with multiple tracks will cause an error

---

|                   |                                                                                   |
|-------------------|-----------------------------------------------------------------------------------|
| convert.bed2exons | <i>convert a data frame read-in from a bed file to a GRanges object for exons</i> |
|-------------------|-----------------------------------------------------------------------------------|

---

**Description**

convert a data frame read-in from a bed file to a GRanges object for exons

**Usage**

```
convert.bed2exons(bed.df)
```

**Arguments**

|        |                                                                                  |
|--------|----------------------------------------------------------------------------------|
| bed.df | a data.frame where column order and content resembles a bed file with 12 columns |
|--------|----------------------------------------------------------------------------------|

**Value**

GRanges object

**Note**

one bed track per file is only accepted, the bed files with multiple tracks will cause an error

---

|                     |                                                                                     |
|---------------------|-------------------------------------------------------------------------------------|
| convert.bed2introns | <i>convert a data frame read-in from a bed file to a GRanges object for introns</i> |
|---------------------|-------------------------------------------------------------------------------------|

---

**Description**

convert a data frame read-in from a bed file to a GRanges object for introns

**Usage**

```
convert.bed2introns(bed.df)
```

**Arguments**

|        |                                                                                  |
|--------|----------------------------------------------------------------------------------|
| bed.df | a data.frame where column order and content resembles a bed file with 12 columns |
|--------|----------------------------------------------------------------------------------|

**Value**

GRanges object

**Note**

one bed track per file is only accepted, the bed files with multiple tracks will cause an error



---

|                |                                                                                  |
|----------------|----------------------------------------------------------------------------------|
| diffMethPerChr | <i>Gets and plots the number of hyper/hypo methylated regions per chromosome</i> |
|----------------|----------------------------------------------------------------------------------|

---

### Description

This accessor function gets the nearest TSS, its distance to target feature, strand and name of TSS/gene from annotationByGenicParts object.

### Usage

```
diffMethPerChr(x, plot=T, qvalue.cutoff=0.01,
meth.cutoff=25, exclude=NULL, ...)
```

### Arguments

|               |                                                                                               |
|---------------|-----------------------------------------------------------------------------------------------|
| x             | a annotationByFeature object                                                                  |
| plot          | TRUE FALSE. If TRUE horizontal barplots for proportion of hypo/hyper methylated bases/regions |
| qvalue.cutoff | cutoff for q-value                                                                            |
| meth.cutoff   | cutoff for percent methylation difference                                                     |
| exclude       | names of chromosomes to be excluded                                                           |
| ...           | extra graphical parameters to be passed to barplot function                                   |

### Value

plots a piechart or a barplot for percentage of the target features overlapping with annotation

---

|                  |                                                                         |
|------------------|-------------------------------------------------------------------------|
| filterByCoverage | <i>filter methylRaw and methylRawList object based on read coverage</i> |
|------------------|-------------------------------------------------------------------------|

---

### Description

This function filters methylRaw and methylRawList objects. You can filter based on lower read cutoff or high read cutoff. Higher read cutoff is usefull to eliminate PCR effects Lower read cutoff is usefull for doing better statistical tests.

### Usage

```
filterByCoverage(methylObj, lo.count=NULL, lo.perc=NULL, hi.count=NULL, hi.perc=NULL)
```

**Arguments**

|                        |                                                                                                                        |
|------------------------|------------------------------------------------------------------------------------------------------------------------|
| <code>methylObj</code> | a <code>methylRaw</code> or <code>methylRawList</code> object                                                          |
| <code>lo.count</code>  | An integer for read counts. Bases/regions having lower coverage than this count is discarded                           |
| <code>lo.perc</code>   | A double [0-100] for percentile of read counts. Bases/regions having lower coverage than this percentile is discarded  |
| <code>hi.count</code>  | An integer for read counts. Bases/regions having higher coverage than this is count discarded                          |
| <code>hi.perc</code>   | A double [0-100] for percentile of read counts. Bases/regions having higher coverage than this percentile is discarded |

**Value**

`methylRaw` or `methylRawList` object depending on input object

---

`get.methylDiff`                      *gets differentially methylated regions/bases based on cutoffs*

---

**Description**

gets differentially methylated regions/bases based on cutoffs

**Usage**

```
get.methylDiff(.Object, difference=25, qvalue=0.01, type="all")
```

**Arguments**

|                         |                                                                                                                                                                                                                                                                        |
|-------------------------|------------------------------------------------------------------------------------------------------------------------------------------------------------------------------------------------------------------------------------------------------------------------|
| <code>.Object</code>    | a <code>methylDiff</code> object                                                                                                                                                                                                                                       |
| <code>difference</code> | cutoff for absolute value of methylation change between test and control (default:25)                                                                                                                                                                                  |
| <code>qvalue</code>     | cutoff for qvalue of differential methylation statistic (default:0.01)                                                                                                                                                                                                 |
| <code>type</code>       | one of the "hyper", "hypo" or "all" strings. Specifies what type of differentially methylated bases/regions should be returned. For retrieving Hyper-methylated regions/bases <code>type="hyper"</code> , for hypo-methylated <code>type="hypo"</code> (default:"all") |

**Value**

a `methylDiff` object containing the differential methylated locations satisfying the criteria

---

getAssembly                      *get assembly of the genome*

---

**Description**

get assembly of the genome

**Arguments**

x                                  a methylBase object

**Value**

the assembly string for the object

---

getAssociationWithTSS    *Get distance to nearest TSS and gene id from annotationByGenicParts*

---

**Description**

This accessor function gets the nearest TSS, its distance to target feature, strand and name of TSS/gene from annotationByGenicParts object

**Usage**

```
getAssociationWithTSS(x)
```

**Arguments**

x                                  a annotationByGenicParts object

**Value**

RETURNS a data.frame containing row number of the target features, distance of target to nearest TSS, TSS/Gene name, TSS strand

---

getContext                      *get the context of methylation*

---

**Description**

get the context of methylation

**Arguments**

x                                  a methylBase/methylRaw/methylDiff object

**Value**

the context of methylation string

---

getCorrelation            *get correlation between samples in methylBase object*

---

### Description

get correlation between samples in methylBase object

### Usage

```
getCorrelation(.Object,method="pearson",plot=FALSE)
```

### Arguments

|         |                                                                                                                                                               |
|---------|---------------------------------------------------------------------------------------------------------------------------------------------------------------|
| .Object | a methylBase object                                                                                                                                           |
| method  | a character string indicating which correlation coefficient (or covariance) is to be computed (default:"pearson", other options are "kendall" and "spearman") |
| plot    | scatterPlot if TRUE (default:FALSE)                                                                                                                           |

### Value

a correlation matrix object and plot scatterPlot

---

getCoverageStats            *get coverage stats from methylRaw object*

---

### Description

get coverage stats from methylRaw object

### Usage

```
getCoverageStats(.Object,plot=FALSE,both.strands=FALSE,labels=TRUE,...)
```

### Arguments

|              |                                                                                                          |
|--------------|----------------------------------------------------------------------------------------------------------|
| .Object      | a methylRaw object                                                                                       |
| plot         | plot a histogram of coverage if TRUE (default:FALSE)                                                     |
| both.strands | do stats and plot for both strands if TRUE (default:FALSE)                                               |
| labels       | should the bars of the histogram have labels showing the percentage of values in each bin (default:TRUE) |
| ...          | options to be passed to hist function                                                                    |

### Value

a summary of coverage statistics or plot a histogram of coverage

---

|         |                                                      |
|---------|------------------------------------------------------|
| getData | <i>gets the data slot from the methylBase object</i> |
|---------|------------------------------------------------------|

---

**Description**

The data retrieved from this function is of a `data.frame`. This is basically containing all relevant methylation information per region

**Arguments**

x                    a methylBase object

**Value**

data.frame for methylation events

---

|                          |
|--------------------------|
| getFeatsWithTargetsStats |
|--------------------------|

*Get the percentage/count of annotation features overlapping with target features from annotationByFeature*

---

**Description**

This function retrieves percentage/number of annotation features overlapping with targets. For example, if `annotationByFeature` object is containing statistics of differentially methylated regions overlapping with gene annotation. This function will return number/percentage of introns, exons and promoters overlapping with differentially methylated regions.

**Usage**

```
getFeatsWithTargetsStats(x, percentage=TRUE)
```

**Arguments**

x                    a `annotationByFeature` object  
percentage        TRUE|FALSE. If TRUE percentage of annotation features will be returned. If FALSE, number of annotation features will be returned

**Value**

RETURNS a vector of percentages or counts showing quantity of annotation features overlapping with target features

---

|           |                                                                                                            |
|-----------|------------------------------------------------------------------------------------------------------------|
| getFlanks | <i>a function to get upstream and downstream adjacent regions to a genomic feature such as CpG islands</i> |
|-----------|------------------------------------------------------------------------------------------------------------|

---

**Description**

a function to get upstream and downstream adjacent regions to a genomic feature such as CpG islands

**Usage**

```
getFlanks(grange, flank=2000, clean=T)
```

**Arguments**

|        |                                                                                                                                                                                              |
|--------|----------------------------------------------------------------------------------------------------------------------------------------------------------------------------------------------|
| grange | GRanges object for the feature                                                                                                                                                               |
| flank  | number of basepairs for the flanking regions                                                                                                                                                 |
| clean  | If set to TRUE, flanks overlapping with other main features will be trimmed, and overlapping flanks will be removed this will remove multiple counts when other features overlap with flanks |

**Value**

GRanges object for flanking regions

---

|            |                                                       |
|------------|-------------------------------------------------------|
| getMembers | <i>Get the membership slot of annotationByFeature</i> |
|------------|-------------------------------------------------------|

---

**Description**

Membership slot defines the overlap of target features with annotation features For example, if a target feature overlaps with an exon

**Usage**

```
getMembers(x)
```

**Arguments**

|   |                              |
|---|------------------------------|
| x | a annotationByFeature object |
|---|------------------------------|

**Value**

RETURNS a matrix showing overlap of target features with annotation features. 1 for overlap, 0 for non-overlap

---

getMethylationStats     *get Methylation stats from methylRaw object*

---

### Description

get Methylation stats from methylRaw object

### Usage

```
getMethylationStats(.Object,plot=FALSE,both.strands=FALSE,labels=TRUE,...)
```

### Arguments

|              |                                                                                                          |
|--------------|----------------------------------------------------------------------------------------------------------|
| .Object      | a methylRaw object                                                                                       |
| plot         | plot a histogram of Methylation if TRUE (default:FALSE)                                                  |
| both.strands | do plots and stats for both strands seperately if TRUE (default:FALSE)                                   |
| labels       | should the bars of the histogram have labels showing the percentage of values in each bin (default:TRUE) |
| ...          | options to be passed to hist function.                                                                   |

### Value

a summary of Methylation statistics or plot a histogram of coverage

---

getTargetAnnotationStats

*Get the percentage of target features overlapping with annotation from annotationByFeature*

---

### Description

This function retrieves percentage/number of target features overlapping with annotation

### Usage

```
getTargetAnnotationStats(x,percentage=TRUE,precedence=TRUE)
```

### Arguments

|            |                                                                                                                                                                                                                                                                                                                                                                                         |
|------------|-----------------------------------------------------------------------------------------------------------------------------------------------------------------------------------------------------------------------------------------------------------------------------------------------------------------------------------------------------------------------------------------|
| x          | a annotationByFeature object                                                                                                                                                                                                                                                                                                                                                            |
| percentage | TRUEIFALSE. If TRUE percentage of target features will be returned. If FALSE, number of target features will be returned                                                                                                                                                                                                                                                                |
| precedence | TRUEIFALSE. If TRUE there will be a hierachy of annotation features when calculating numbers (with promoter>exon>intron precedence) That means if a feature overlaps with a promoter it will be counted as promoter overlapping only, or if it is overlapping with a an exon but not a promoter, it will be counted as exon overlapping only whether or not it overlaps with an intron. |

**Value**

RETURNS a vector of percentages or counts showing quantity of target features overlapping with annotation

---

|                  |                                                                                                                                                                            |
|------------------|----------------------------------------------------------------------------------------------------------------------------------------------------------------------------|
| methylBase-class | <i>An S4 class that holds base-pair resolution methylation information for multiple experiments, only bases that are covered in all experiments are held in this class</i> |
|------------------|----------------------------------------------------------------------------------------------------------------------------------------------------------------------------|

---

**Description**

extends data.frame and creates an object that holds methylation information and genomic location

**Slots**

sample.ids: character vector for ids of samples in the object  
 assembly: name of the genome assembly  
 context: context of methylation. Ex: CpG,CpH,CHH, etc  
 treatment: treatment vector denoting which samples are test and control  
 coverage.index: vector denoting which columns in the data corresponds to coverage values  
 numCs.index: vector denoting which columns in the data corresponds to number of methylatedCs values  
 numTs.index: vector denoting which columns in the data corresponds to number of unmethylated Cs values  
 resolution: resolution of methylation information, allowed values: 'base' or 'region'

---

|                |                                   |
|----------------|-----------------------------------|
| methylBase.obj | <i>Example methylBase object.</i> |
|----------------|-----------------------------------|

---

**Description**

methylKit has several objects. This data set includes examples of the following objects: methylBase, methylDiff and methylRawList. You can load the data using data(methylKit)

**Format**

methylBase.obj object stores the location and methylation information for bases that are covered in all samples. methylBase partially extends data.frame S3 class.



---

|                  |                                                                    |
|------------------|--------------------------------------------------------------------|
| methylDiff-class | <i>An S4 class that holds differential methylation information</i> |
|------------------|--------------------------------------------------------------------|

---

**Description**

This object is designed to hold statistics and locations for differentially methylated regions/bases

**Slots**

`sample.ids` ids/names of samples in a vector  
`assembly` a name of genome assembly, such as :hg18,mm9, etc  
`context` numeric vector identifying which samples are which group  
`treatment` numeric vector identifying which samples are which group  
`destranded` logical denoting if methylation information is destranded or not  
`resolution` string either 'base' or 'region' defining the resolution of methylation information  
`.Data` data.frame holding the locations and statistics

---

|                |                                   |
|----------------|-----------------------------------|
| methylDiff.obj | <i>Example methylKit objects.</i> |
|----------------|-----------------------------------|

---

**Description**

methylKit has several objects. This data set includes examples of the following objects: methylBase, methylDiff and methylRawList. You can load the data using `data(methylKit)`

**Format**

The Differential methylation information is stored in methylDiff.obj object. methylBase partially extends data.frame S3 class.

---

|                 |                                                                              |
|-----------------|------------------------------------------------------------------------------|
| methylRaw-class | <i>An S4 class for holding raw methylation data from alignment pipeline.</i> |
|-----------------|------------------------------------------------------------------------------|

---

**Description**

This object stores the raw methylation data that is read in through read function and extends data.frame

**Slots**

`sample.id`: string for an identifier of the sample  
`assembly`: string for genome assembly, ex: hg18,hg19,mm9  
`context`: methylation context string, ex: CpG,CpH,CHH, etc.  
`resolution`: resolution of methylation information, 'base' or 'region'

---

`methylRawList-class`     *An S4 class for holding a list of methylRaw objects.*

---

### Description

This object stores the list of raw methylation data that is read in through read function and extends `data.frame`

### Slots

`treatment`: numeric vector denoting control and test samples

---

`methylRawList.obj`     *Example methylRawList object.*

---

### Description

`methylKit` has several objects. This data set includes examples of the following objects: `methylBase`, `methylDiff` and `methylRawList`. You can load the data using `data(methylKit)`

### Format

Methylation data from multiple the samples regardless of common coverage are stored in `methylRawList.obj` object. `methylRawList` extends `list` S3 class

---

`normalizeCoverage`     *normalize read coverage between samples*

---

### Description

The function normalizes coverage values between samples using a scaling factor derived from differences between mean or median of coverage distributions

### Usage

```
normalizeCoverage(obj,method="median")
```

### Arguments

`obj`                    `methylRawList` object

`method`                a string "mean" or "median" which denotes median or mean should be used to calculate scaling factor. (Default:median)

### Value

a `methylRawList` object

**Author(s)**

Altuna Akalin

**Examples**

```
library(methylKit)
data(methylKit)
newObj=normalizeCoverage(methylRawList.obj)
```

PCASamples

*CpG Dinucleotide Methylation Principal Components Analysis***Description**

CpG Dinucleotide Methylation Principal Components Analysis

**Usage**

```
PCASamples(.Object, cor=TRUE, screeplot=FALSE,
adj.lim=c(0.0004,0.1), scale=TRUE, center=TRUE, comp=c(1,2), transpose=TRUE, sd.threshold=0, obj.ret
```

**Arguments**

|              |                                                                                                                                                                                                                                                                                                                                                                                                                                                                                 |
|--------------|---------------------------------------------------------------------------------------------------------------------------------------------------------------------------------------------------------------------------------------------------------------------------------------------------------------------------------------------------------------------------------------------------------------------------------------------------------------------------------|
| .Object      | a methylBase object                                                                                                                                                                                                                                                                                                                                                                                                                                                             |
| cor          | [Not used anymore] cor a logical value indicating whether the calculation should use the correlation matrix or the covariance matrix. (default: TRUE)                                                                                                                                                                                                                                                                                                                           |
| screeplot    | a logical value indicating whether to plot the variances against the number of the principal component. (default: FALSE)                                                                                                                                                                                                                                                                                                                                                        |
| adj.lim      | a vector indicating the propotional adjustment of xlim (adj.lim[1]) and ylim (adj.lim[2]). (default: c(0.0004,0.1))                                                                                                                                                                                                                                                                                                                                                             |
| scale        | logical indicating if prcomp should scale the data to have unit variance or not (default: TRUE)                                                                                                                                                                                                                                                                                                                                                                                 |
| center       | logical indicating if prcomp should center the data or not (default: TRUE)                                                                                                                                                                                                                                                                                                                                                                                                      |
| comp         | vector of integers with 2 elements specifying which components to be plotted.                                                                                                                                                                                                                                                                                                                                                                                                   |
| transpose    | if TRUE (default) percent methylation matrix will be transposed, this is equivalent to doing PCA on variables that are regions/bases. The resulting plot will location of samples in the new coordinate system if FALSE the variables for the matrix will be samples and the resulting plot whill show how each sample (variable) contributes to the principle component. the samples that are highly correlated should have similar contributions to the principal components. |
| sd.threshold | standard deviation threshold to remove bases/regions that have dev. lower than this threshold. if NULL no strandard deviation will be calculated and this threshold will not be applied.                                                                                                                                                                                                                                                                                        |
| obj.return   | if the result of prcomp function should be returned or not. Default:FALSE                                                                                                                                                                                                                                                                                                                                                                                                       |

**Value**

The form of the value returned by PCASamples is the summary of principal component analysis by prcomp.

**Note**

cor option is not in use anymore, since prcomp is used for PCA analysis instead of princomp

---

percMethylation      *get percent methylation scores from methylBase object*

---

**Description**

get percent methylation scores from methylBase object

**Usage**

```
percMethylation(methylBase.obj)
```

**Arguments**

methylBase.obj a methylBase object

**Value**

matrix with percent methylation values per base/region across all samples, row names would be base/region identifiers

---

plotTargetAnnotation      *Plot annotation categories from annotationByGenicParts or annotationByFeature*

---

**Description**

This function plots a pie or bar chart for showing percentages of targets annotated by genic parts or other query features

**Arguments**

|            |                                                                                                                                                                                                          |
|------------|----------------------------------------------------------------------------------------------------------------------------------------------------------------------------------------------------------|
| x          | a annotationByFeature or annotationByGenicParts object                                                                                                                                                   |
| precedence | TRUE FALSE. If TRUE there will be a hierachy of annotation features when calculating numbers (with promoter>exon>intron precedence). This option is only valid when x is a annotationByGenicParts object |
| col        | a vector of colors for piechart or the bar plot                                                                                                                                                          |
| ...        | graphical parameters to be passed to pie or barplot functions<br>usage plotTargetAnnotation(x,precedence=TRUE,col,...)                                                                                   |

**Value**

plots a piechart or a barplot for percentage of the target features overlapping with annotation

---

|      |                                                                             |
|------|-----------------------------------------------------------------------------|
| pool | <i>function pools replicates within groups to a single sample per group</i> |
|------|-----------------------------------------------------------------------------|

---

**Description**

The function sums up coverage, numCs and numTs values within each group so one representative sample for each group will be created in a new methylBase object

**Usage**

```
pool(obj, sample.ids)
```

**Arguments**

|            |                                                                                                                                                                                        |
|------------|----------------------------------------------------------------------------------------------------------------------------------------------------------------------------------------|
| obj        | methylBase object with two groups or more and each group should have multiple samples                                                                                                  |
| sample.ids | a character vector of new sample.ids ex:c("test","control"), should follow the same order as unique treatment vector, and should be equal to the length of the unique treatment vector |

**Value**

a methylBase object

**Author(s)**

Altuna Akalin

**Examples**

```
library(methylKit)
data(methylKit)
newBase=pool(methylBase.obj, sample.ids=c("test", "control"))
```

---

|      |                                                            |
|------|------------------------------------------------------------|
| read | <i>read file(s) to a methylrawList or methylraw object</i> |
|------|------------------------------------------------------------|

---

**Description**

read a list of locations or one location and create a methylrawList or methylraw object

**Usage**

```
read(location, sample.id, assembly, pipeline="amp", header=T,
context="CpG", resolution="base", treatment)
```

**Arguments**

|            |                                                                                                                                              |
|------------|----------------------------------------------------------------------------------------------------------------------------------------------|
| location   | file location(s), either a list of locations (each a character string) or one location string                                                |
| sample.id  | sample.id(s)                                                                                                                                 |
| assembly   | a string that defines the genome assembly such as hg18, mm9                                                                                  |
| header     | if the input file has a header or not (default: TRUE)                                                                                        |
| pipeline   | name of the alignment pipeline, currently only supports amp or bismark (default: 'amp')                                                      |
| resolution | designates whether methylation information is base-pair resolution or regional resolution. allowed values 'base' or 'region'. Default 'base' |
| treatment  | a vector containing 0 and 1 denoting which samples are control which samples are test                                                        |
| context    | methylation context string, ex: CpG,CpH,CHH, etc. (default:CpG)                                                                              |

**Value**

returns methylRaw or methylRawList

---

|          |                                                  |
|----------|--------------------------------------------------|
| read.bed | <i>read a bed file and convert it to GRanges</i> |
|----------|--------------------------------------------------|

---

**Description**

read a bed file and convert it to GRanges

**Usage**

```
read.bed(location,remove.unusual=TRUE)
```

**Arguments**

|                |                                                                                           |
|----------------|-------------------------------------------------------------------------------------------|
| location       | location of the file, a character string such as: "/home/user/my.bed"                     |
| remove.unusual | if TRUE(default) remove the chromosomes with unusual names, mainly random chromosomes etc |

**Value**

[GRanges](#) object

**Note**

one bed track per file is only accepted, the bed files with multiple tracks will cause an error

---

|              |                                                                                     |
|--------------|-------------------------------------------------------------------------------------|
| read.bismark | <i>Function to read in percent methylation scores from sorted Bismark SAM files</i> |
|--------------|-------------------------------------------------------------------------------------|

---

### Description

The function calls methylation percentage per base from sorted Bismark SAM files. Bismark is a popular aligner for high-throughput bisulfite sequencing experiments and it outputs its results in SAM format by default. Bismark SAM format contains aligner specific tags which are absolutely necessary for methylation percentage calling. SAM files from other aligners will not work with this function.

### Usage

```
read.bismark(location, sample.id, assembly, save.folder=NULL, save.context=c("CpG"), read.context="
```

### Arguments

|              |                                                                                                                                                                                                                                                                                                                              |
|--------------|------------------------------------------------------------------------------------------------------------------------------------------------------------------------------------------------------------------------------------------------------------------------------------------------------------------------------|
| location     | location of sam file(s). If multiple files are given this argument must be a list.                                                                                                                                                                                                                                           |
| sample.id    | the id(s) of samples in the same order as file. If multiple sam files are given this argument must be a list.                                                                                                                                                                                                                |
| save.folder  | The folder which will be used to save methylation call files, if set to NULL no methylation call file will be saved as a text file. The files saved can be read into R in less time using read function in methylKit                                                                                                         |
| save.context | A character vector consisting following strings: "CpG", "CHG", "CHH". The methylation percentages for these methylation contexts will be saved to save.folder                                                                                                                                                                |
| read.context | One of the 'CpG', 'CHG', 'CHH' or 'none' strings. Determines what type of methylation context will be read-in to the memory which can be immediately used for analysis. If given as 'none', read.bismark will not return any object, but if a save.folder argument given it will save the methylation percentage call files. |
| assembly     | string that determines the genome assembly. Ex: mm9, hg18 etc.                                                                                                                                                                                                                                                               |
| noLap        | if set to TRUE and the SAM file has paired-end reads, the one read of the overlapping paired-end read pair will be ignored for methylation calling.                                                                                                                                                                          |
| mincov       | minimum read coverage to call a methylation status for a base.                                                                                                                                                                                                                                                               |
| minqual      | minimum phred quality score to call a methylation status for a base.                                                                                                                                                                                                                                                         |
| phred64      | logical ( default: FALSE) you will not need to set this TRUE, Currently bismark gives only phred33 scale                                                                                                                                                                                                                     |
| treatment    | treatment vector only to be used when location and sample.id parameters are lists and you are trying to read-in multiple samples that are related to eachother in down-stream analysis.                                                                                                                                      |

### Value

methylRaw or methylRawList object

**Examples**

```
# read.bismark("/Users/altuna/Dropbox\\ Encore/Dropbox/temp/data/bismark_6.4_trial/test.fastq_bismark.sam")
#   save.folder="/Users/altuna",save.context="CpG",read.context="none")
# file.list2=list(system.file("extdata", "test.fastq_bismark.sorted.min.sam", package = "methylKit"),
#                 system.file("extdata", "test.fastq_bismark.sorted.min.sam", package = "methylKit"),
#                 system.file("extdata", "test.fastq_bismark.sorted.min.sam", package = "methylKit"),
#                 system.file("extdata", "test.fastq_bismark.sorted.min.sam", package = "methylKit"))
#
# objs=read.bismark(location=file.list2
#                   ,sample.id=list("test1","test2","ctr11","ctr11"),assembl="hg18",save.folder=NULL,save.context="CpG",
#                   nolap=FALSE,mincov=10,minqual=20,phred64=FALSE,treatment=c(1,1,0,0))
```

---

|                    |                                                                                                                                       |
|--------------------|---------------------------------------------------------------------------------------------------------------------------------------|
| read.feature.flank | <i>a function to read-in genomic features and their upstream and downstream adjacent regions such as CpG islands and their shores</i> |
|--------------------|---------------------------------------------------------------------------------------------------------------------------------------|

---

**Description**

a function to read-in genomic features and their upstream and downstream adjacent regions such as CpG islands and their shores

**Usage**

```
read.feature.flank(location,remove.unusual=TRUE,flank=2000,clean=TRUE,feature.flank.name=NULL)
```

**Arguments**

|                    |                                                                                                                  |
|--------------------|------------------------------------------------------------------------------------------------------------------|
| location           | for the bed file of the feature                                                                                  |
| flank              | number of basepairs for the flanking regions                                                                     |
| clean              | If set to TRUE, flanks overlapping with other main features will be trimmed                                      |
| remove.unusual     | remove chromosomes with unusual names random, Un and anything with "_" character                                 |
| feature.flank.name | the names for feature and flank ranges, it should be a character vector of length 2. example: c("CpGi","shores") |

**Value**

a GenomicRangesList containing one GRanges object for flanks and one for GRanges object for the main feature.

**Examples**

```
# location of the example CpG file
my.loc=system.file("extdata", "cpgi.hg18.bed.txt", package = "methylKit")
cpg.obj=read.feature.flank(location=my.loc,feature.flank.name=c("CpGi","shores"))
```



---

read.transcript.features  
*function reading exon intron, promoter structure from a given bed file*

---

**Description**

function reading exon intron, promoter structure from a given bed file

**Usage**

```
read.transcript.features(location,remove.unusual=TRUE,up.flank=1000,down.flank=1000,unique.prom
```

**Arguments**

|                |                                                                                                                |
|----------------|----------------------------------------------------------------------------------------------------------------|
| location       | location of the bed file with 12 or more columns                                                               |
| remove.unusual | remove the chromosomes with unusual names, mainly random chromosomes etc                                       |
| up.flank       | up-stream from TSS to detect promoter boundaries                                                               |
| down.flank     | down-stream from TSS to detect promoter boundaries                                                             |
| unique.prom    | get only the unique promoters, promoter boundaries will not have a gene name if you set this option to be TRUE |

**Value**

a [GRangesList](#) containing locations of exon/intron/promoter/TSS

**Note**

one bed track per file is only accepted, the bed files with multiple tracks will cause an error

---

regionCounts                      *GETs regional counts for given GRanges or GRangesList object*

---

**Description**

Convert methylRaw or methylRawList object into regional counts for a given GRanges or GRangesList object.

**Usage**

```
regionCounts(methylObj,regions,cov.bases=0,strand.aware=FALSE)
```

**Arguments**

|              |                                                                                                                         |
|--------------|-------------------------------------------------------------------------------------------------------------------------|
| methylObj    | a methylRaw or methylRawList object                                                                                     |
| regions      | a GRanges or GRangesList object.                                                                                        |
| cov.bases    | number minimum bases covered per region (Default:0). Only regions with base coverage above this threshold are returned. |
| strand.aware | if set to TRUE only CpGs that match the strand of the region will be summarized                                         |

**Value**

RETURNS a new methylRaw or methylRawList object

---

|            |                                                                                                       |
|------------|-------------------------------------------------------------------------------------------------------|
| reorganize | <i>reorganize methylRawList and methylBase objects by creating new objects from subset of samples</i> |
|------------|-------------------------------------------------------------------------------------------------------|

---

**Description**

Create a new methylRawList or methylBase object by selecting a subset of samples from the input object, which is a methylRawList or methylBase object. You can use the function to partition a large methylRawList or methylBase object to smaller object based on sample ids or when you want to reorder samples and treatment vector.

**Usage**

```
reorganize(methylObj, sample.ids, treatment)
```

**Arguments**

|            |                                                                                                                                                                                              |
|------------|----------------------------------------------------------------------------------------------------------------------------------------------------------------------------------------------|
| methylObj  | a methylRawList or methylBase object                                                                                                                                                         |
| sample.ids | a vector for sample.ids to be subset. Order is important and the order should be similar to treatment. sample.ids should be a subset or reordered version of sample ids in the input object. |
| treatment  | treatment vector, should be same length as sample.ids vector                                                                                                                                 |

**Value**

RETURNS a methylRawList or methylBase object depending on the input object

**Examples**

```
# this is a list of example files, ships with the package
file.list=list( system.file("extdata", "test1.myCpG.txt", package = "methylKit"),
system.file("extdata", "test2.myCpG.txt", package = "methylKit"),
system.file("extdata", "control1.myCpG.txt", package = "methylKit"),
system.file("extdata", "control2.myCpG.txt", package = "methylKit") )

# read the files to a methylRawList object: myobj
myobj=read( file.list,
sample.id=list("test1","test2","ctrl1","ctrl2"),assembly="hg18",pipeline="amp",treatment=c(1,1,0,0))
meth=unite(myobj,destrand=TRUE)

myobj2=reorganize(myobj,sample.ids=c("test1","ctrl2"),treatment=c(1,0) )
meth2 =reorganize(meth,sample.ids=c("test1","ctrl2"),treatment=c(1,0) )
```

---

|        |                                                                         |
|--------|-------------------------------------------------------------------------|
| select | <i>selects rows from of methylRaw.methylBase and methylDiff objects</i> |
|--------|-------------------------------------------------------------------------|

---

**Description**

selects rows from of methylRaw.methylBase and methylDiff objects

**Examples**

```
# select(methylRaw.obj,1:100) # selects first hundred rows, returns a methylRaw object
# select(methylBase.obj,1:100)
# select(methylDiff.obj,1:100)
```

---

|      |                                                      |
|------|------------------------------------------------------|
| show | <i>show method for some of the methylKit classes</i> |
|------|------------------------------------------------------|

---

**Description**

show method for some of the methylKit classes

---

|                  |                                                                   |
|------------------|-------------------------------------------------------------------|
| tileMethylCounts | <i>Get methylated/unmethylated base counts for tiling windows</i> |
|------------------|-------------------------------------------------------------------|

---

**Description**

The function summarizes methylated/unmethylated base counts over tiling windows accross genome. This function can be used when differential methylated analysis is preferable to tiling windows instead of base pairs.

**Usage**

```
tileMethylCounts(methylObj,win.size=1000,step.size=1000,cov.bases=0)
```

**Arguments**

|           |                                                                                           |
|-----------|-------------------------------------------------------------------------------------------|
| methylObj | methylRaw or methylRawList object containing base pair resolution methylation information |
| win.size  | an integer for the size of the tiling windows                                             |
| step.size | an integer for the step size of tiling windows                                            |
| cov.bases | minimum number of bases to be covered in a given window                                   |

**Value**

methylRaw or methylRawList object

---

|       |                                               |
|-------|-----------------------------------------------|
| unite | <i>unites methylRawList to a single table</i> |
|-------|-----------------------------------------------|

---

### Description

This functions unites methylRawList object that only bases with coverage from all samples are retained. The resulting object is a class of methylBase

### Usage

```
unite(.Object,destrand=FALSE,min.per.group=NULL)
```

### Arguments

|               |                                                                                                                                                                                                                                                                                                                                                                                                                                                                                                                                                                            |
|---------------|----------------------------------------------------------------------------------------------------------------------------------------------------------------------------------------------------------------------------------------------------------------------------------------------------------------------------------------------------------------------------------------------------------------------------------------------------------------------------------------------------------------------------------------------------------------------------|
| .Object       | a methylRawList object to be merged by common locations covered by reads                                                                                                                                                                                                                                                                                                                                                                                                                                                                                                   |
| destrand      | if TRUE, reads covering both strands of a CpG dinucleotide will be merged, do not set to TRUE if not only interested in CpGs (default: FALSE). If the methylRawList object contains regions rather than bases setting destrand to TRUE will have no effect.                                                                                                                                                                                                                                                                                                                |
| min.per.group | an integer denoting minimum number of samples per replicate needed to cover a region/base. By default only regions/bases that are covered in all samples are united as methylBase object, however by supplying an integer for this argument users can control how many samples needed to cover region/base to be united as methylBase object. For example, if min.per.group set to 2 and there are 3 replicates per condition, the bases/regions that are covered in at least 2 replicates will be united and missing data for uncovered bases/regions will appear as NAs. |

### Value

a methylBase object

### Examples

```
## myobj is a methylRawList object
# unite(myobj)
# unite(myobj,min.per.group=1L) # at least 1 sample per group should be covered for any given base/region
# unite(myobj,destrand=TRUE)
```

# Index

annotate.WithFeature, 2  
annotate.WithFeature,GRanges,GRanges-method  
    (annotate.WithFeature), 2  
annotate.WithFeature,methylDiff,GRanges-method  
    (annotate.WithFeature), 2  
annotate.WithFeature.Flank, 3  
annotate.WithFeature.Flank,GRanges,GRanges,GRanges-method  
    (annotate.WithFeature.Flank), 3  
annotate.WithFeature.Flank,methylDiff,GRanges,GRanges-method  
    (annotate.WithFeature.Flank), 3  
annotate.WithGenicParts, 4  
annotate.WithGenicParts,GRanges,GRangesList-method  
    (annotate.WithGenicParts), 4  
annotate.WithGenicParts,methylDiff,GRangesList-method  
    (annotate.WithGenicParts), 4  
annotationByFeature-class, 4  
annotationByGenicParts-class, 5  
  
bedgraph, 5  
bedgraph,methylDiff-method (bedgraph), 5  
bedgraph,methylRaw-method (bedgraph), 5  
bedgraph,methylRawList-method  
    (bedgraph), 5  
  
calculateDiffMeth, 6  
calculateDiffMeth,methylBase-method  
    (calculateDiffMeth), 6  
clusterSamples, 6  
clusterSamples,methylBase-method  
    (clusterSamples), 6  
convert.bed.df, 7  
convert.bed.df,data.frame-method  
    (convert.bed.df), 7  
convert.bed2exons, 8  
convert.bed2exons,data.frame-method  
    (convert.bed2exons), 8  
convert.bed2introns, 8  
convert.bed2introns,data.frame-method  
    (convert.bed2introns), 8  
  
diffMethPerChr, 9  
diffMethPerChr,methylDiff-method  
    (diffMethPerChr), 9  
  
filterByCoverage, 9  
filterByCoverage,methylRaw-method  
    (filterByCoverage), 9  
filterByCoverage,methylRawList-method  
    (filterByCoverage), 9  
  
get.methylDiff, 10  
get.methylDiff,methylDiff-method  
    (get.methylDiff), 10  
getAssembly, 11  
getAssembly,methylBase-method  
    (getAssembly), 11  
getAssembly,methylRaw-method  
    (getAssembly), 11  
getAssociationWithTSS, 11  
getAssociationWithTSS,-methods  
    (getAssociationWithTSS), 11  
getAssociationWithTSS,annotationByGenicParts-method  
    (getAssociationWithTSS), 11  
getContext, 11  
getContext,methylBase-method  
    (getContext), 11  
getContext,methylDiff-method  
    (getContext), 11  
getContext,methylRaw-method  
    (getContext), 11  
getCorrelation, 12  
getCorrelation,-methods  
    (getCorrelation), 12  
getCorrelation,methylBase-method  
    (getCorrelation), 12  
getCorrelation-method (getCorrelation),  
    12  
getCoverageStats, 12  
getCoverageStats,-methods  
    (getCoverageStats), 12  
getCoverageStats,methylRaw-method  
    (getCoverageStats), 12  
getData, 13  
getData,-methods (getData), 13  
getData,methylBase-method (getData), 13  
getData,methylDiff-method (getData), 13  
getData,methylRaw-method (getData), 13  
getData-method (getData), 13  
getFeatsWithTargetsStats, 13

- getFeatsWithTargetsStats, annotationByFeature-method (getFeatsWithTargetsStats), 13
- getFlanks, 14
- getFlanks, GRanges-method (getFlanks), 14
- getMembers, 14
- getMembers, annotationByFeature-method (getMembers), 14
- getMethylationStats, 15
- getMethylationStats, methylRaw-method (getMethylationStats), 15
- getTargetAnnotationStats, 15
- getTargetAnnotationStats, annotationByFeature-method (getTargetAnnotationStats), 15
- GRanges, 7, 8, 22
- GRangesList, 25
- methylBase-class, 16
- methylBase.obj, 16
- methylDiff-class, 17
- methylDiff.obj, 17
- methylRaw-class, 17
- methylRawList-class, 18
- methylRawList.obj, 18
- normalizeCoverage, 18
- normalizeCoverage, methylRawList-method (normalizeCoverage), 18
- PCASamples, 19
- PCASamples, methylBase-method (PCASamples), 19
- percMethylation, 20
- percMethylation, methylBase-method (percMethylation), 20
- plotTargetAnnotation, 20
- plotTargetAnnotation, annotationByFeature-method (plotTargetAnnotation), 20
- pool, 21
- pool, methylBase-method (pool), 21
- read, 21
- read, character, character, character-method (read), 21
- read, list, list, character-method (read), 21
- read.bed, 22
- read.bed, character-method (read.bed), 22
- read.bismark, 23
- read.bismark, character, character, character-method (read.bismark), 23
- read.bismark, list, list, character-method (read.bismark), 23
- read.feature.flank, 24
- read.feature.flank, character-method (read.feature.flank), 24
- read.transcript.features, 25
- read.transcript.features, character-method (read.transcript.features), 25
- regionCounts, 25
- regionCounts, methylRaw, GRanges-method (regionCounts), 25
- regionCounts, methylRaw, GRangesList-method (regionCounts), 25
- regionCounts, methylRawList, GRanges-method (regionCounts), 25
- regionCounts, methylRawList, GRangesList-method (regionCounts), 25
- reorganize, 26
- reorganize, methylBase-method (reorganize), 26
- reorganize, methylRawList-method (reorganize), 26
- select, 27
- select, methylBase-method (select), 27
- select, methylDiff-method (select), 27
- select, methylRaw-method (select), 27
- show, 27
- show, annotationByFeature-method (show), 27
- show, annotationByGenicParts-method (show), 27
- show, methylDiff-method (show), 27
- tileMethylCounts, 27
- tileMethylCounts, methylRaw-method (tileMethylCounts), 27
- tileMethylCounts, methylRawList-method (tileMethylCounts), 27
- unite, 28
- unite, -methods (unite), 28
- unite, methylRawList-method (unite), 28
